# Supplementary material
Source: PubMed Central journal article supplement (PMC4273387)
Supplement: pnas.201406755SI.pdf [file pnas.201406755SI.pdf]

# Supporting Information

Zhang et al. 10.1073/pnas.1406755111

## SI Appendix

**Assumptions and Corollaries.** Throughout the binary-choice model, we assume that  $(z_a, z_b)$ ,  $(y_{a,i}, y_{b,i})$ ,  $\log(fz_a + (1-f)z_b)$ , and  $\log(fy_{a,i} + (1-f)y_{b,i})$  have finite moments up to order 2 for all  $f \in [0, 1]$  and  $i$ . We assume further that, for all  $f \in [0, 1]$ ,  $\mathbb{E}[fz_a + (1-f)z_b] = \mathbb{E}[fy_{a,i} + (1-f)y_{b,i}]$  for all  $i$ , so that we can compare growth rates of populations in different environments. More specifically, the optimal log geometric average growth rate increases as the portion of idiosyncratic risk increases:

$$\alpha_{\lambda_1}(f_{\lambda_1}^*) \geq \alpha_{\lambda_2}(f_{\lambda_2}^*) \quad \text{if } 0 \leq \lambda_1 \leq \lambda_2 \leq 1.$$

To prove this result, for any given  $f$ , take the first derivative of  $\alpha_\lambda(f)$  with respect to  $\lambda$ :

$$\frac{\partial \alpha_\lambda(f)}{\partial \lambda} = \mathbb{E}_z \left[ \frac{z^f - \mathbb{E}[y^f]}{\lambda z^f + (1-\lambda)\mathbb{E}[y^f]} \right].$$

Evaluate the first derivative at  $\lambda=0, 1$ , and recall that our assumptions imply that  $\mathbb{E}_z[z^f] = \mathbb{E}_y[y^f]$ :

$$\begin{aligned} \left. \frac{\partial \alpha_\lambda(f)}{\partial \lambda} \right|_{\lambda=0} &= \mathbb{E}_z \left[ \frac{z^f - \mathbb{E}[y^f]}{\mathbb{E}[y^f]} \right] = 0, \\ \left. \frac{\partial \alpha_\lambda(f)}{\partial \lambda} \right|_{\lambda=1} &= \mathbb{E}_z \left[ \frac{z^f - \mathbb{E}[y^f]}{z^f} \right] = 1 - \mathbb{E}_y[y^f] \mathbb{E}_z \left[ \frac{1}{z^f} \right] \leq 0, \end{aligned}$$

where the last step uses Jensen's Inequality. Now, take the second derivative of  $\alpha_\lambda(f)$  with respect to  $\lambda$ :

$$\frac{\partial^2 \alpha_\lambda(f)}{\partial \lambda^2} = \mathbb{E}_z \left[ \frac{-(z^f - \mathbb{E}[y^f])^2}{(\lambda z^f + (1-\lambda)\mathbb{E}[y^f])^2} \right] \leq 0.$$

Therefore, for any given  $f$ ,  $\alpha_\lambda(f)$  is a nonincreasing concave function in the interval  $0 \leq \lambda \leq 1$ . Because  $\alpha_\lambda(f_{\lambda}^*)$  is the maximum of  $\alpha_\lambda(f)$  over all  $f$ , it follows that  $\alpha_{\lambda_1}(f_{\lambda_1}^*) \geq \alpha_{\lambda_2}(f_{\lambda_2}^*)$  whenever  $\lambda_1 \leq \lambda_2$ , as desired.

**Proof of Eqs. 2 and 3.** The total number of offspring of type  $f$  in generation  $t$  is simply the sum of all of the offspring from the type  $f$  individuals of the previous generation:

$$\begin{aligned} n_t^f &= \sum_{i=1}^{n_{t-1}^f} x_{i,t}^f = \lambda \sum_{i=1}^{n_{t-1}^f} z_{i,t}^f + (1-\lambda) \sum_{i=1}^{n_{t-1}^f} y_{i,t}^f \\ &= \lambda \left( z_{a,t} \sum_{i=1}^{n_{t-1}^f} I_{i,t}^f + z_{b,t} \sum_{i=1}^{n_{t-1}^f} (1 - I_{i,t}^f) \right) \\ &\quad + (1-\lambda) \left( \sum_{i=1}^{n_{t-1}^f} I_{i,t}^f y_{a,i,t} + \sum_{i=1}^{n_{t-1}^f} (1 - I_{i,t}^f) y_{b,i,t} \right), \end{aligned}$$

where we have added time subscripts to the relevant variables to clarify their temporal ordering. As  $n_{t-1}^f$  increases without bound, the Law of Large Numbers implies that

$$\begin{aligned} n_t^f &\stackrel{p}{=} n_{t-1}^f (\lambda(fz_{a,t} + (1-f)z_{b,t}) + (1-\lambda)(f\mathbb{E}_y[y_a] + (1-f)\mathbb{E}_y[y_b])) \\ &= n_{t-1}^f (\lambda(fz_{a,t} + (1-f)z_{b,t}) + (1-\lambda)\mathbb{E}_y[y^f]), \end{aligned}$$

where  $\stackrel{p}{=}$  denotes equality in probability. Through backward recursion and assuming that  $n_0^f = 1$  without loss of generality, the population of type  $f$  individuals in generation  $T$  is given by

$$n_T^f \stackrel{p}{=} \prod_{t=1}^T (\lambda(fz_{a,t} + (1-f)z_{b,t}) + (1-\lambda)\mathbb{E}_y[y^f]).$$

Taking the logarithm on both sides and again, using the Law of Large Numbers, we get

$$\begin{aligned} \frac{1}{T} \log n_T^f &\stackrel{p}{=} \frac{1}{T} \sum_{t=1}^T \log (\lambda(fz_{a,t} + (1-f)z_{b,t}) \\ &\quad + (1-\lambda)\mathbb{E}_y[y^f]) \xrightarrow{p} \mathbb{E}_z [\log (\lambda z^f + (1-\lambda)\mathbb{E}_y[y^f])], \end{aligned}$$

where  $\xrightarrow{p}$  denotes convergence in probability, which completes the proof of Eq. 2. Eq. 3 simply rewrites Eq. 2.

**Examples for Common Distributions of Relative Fecundity.** Define  $R = \omega_a^f / \omega_b^f$  to be the relative fecundity of two actions. We can characterize the growth-optimal behavior  $f^*$  for common distribution of  $R$ . Fig. S1 plots  $f^*$  for five distributions of  $R$  as a function of distribution parameters.

**Lognormal distribution.** Let  $R$  follow the lognormal distribution  $\log N(\Delta\alpha, \Delta\beta^2)$ . The expectations of  $R$  and  $1/R$  are

$$\mathbb{E}[R] = \exp\left(\Delta\alpha + \frac{\Delta\beta^2}{2}\right) \text{ and}$$

$$\mathbb{E}[1/R] = \exp\left(-\Delta\alpha + \frac{\Delta\beta^2}{2}\right).$$

Therefore, the optimal behavior  $f^*$  is given by

$$f^* = \begin{cases} 1 & \text{if } \frac{\Delta\beta^2}{2} < \Delta\alpha \\ \text{between 0 and 1} & \text{if } \frac{\Delta\beta^2}{2} \geq |\Delta\alpha| \\ 0 & \text{if } \frac{\Delta\beta^2}{2} < -\Delta\alpha. \end{cases}$$

**$\gamma$ -Distribution.** Let  $R$  follow the  $\gamma$ -distribution  $\gamma(\alpha, \beta)$ , where  $\alpha > 0, \beta > 0$ . The expectation of  $1/R$  exists only for  $\alpha > 1$ , and therefore, the parameter space is restricted to  $\alpha > 1, \beta > 0$ :

$$\mathbb{E}[R] = \frac{\alpha}{\beta} \text{ and}$$

$$\mathbb{E}[1/R] = \frac{\beta}{\alpha - 1}.$$

Therefore, the optimal behavior  $f^*$  is given by

$$f^* = \begin{cases} 1 & \text{if } \beta < \alpha - 1 \\ \text{between 0 and 1} & \text{if } \alpha - 1 \leq \beta \leq \alpha \\ 0 & \text{if } \beta > \alpha. \end{cases}$$

As special cases of  $\gamma$ -distribution, we automatically have the results for the exponential,  $\chi^2$ , and Erlang distribution.

**Pareto distribution.** Let  $R$  follow the Pareto distribution  $\text{Pareto}(x_m, \alpha)$ , where  $x_m > 0, \alpha > 0$ . The expectation of  $R$  exists only for  $\alpha > 1$ , and therefore, the parameter space is restricted to  $x_m > 0, \alpha > 1$ :

$$\mathbb{E}[R] = \frac{\alpha x_m}{\alpha - 1} \text{ and}$$

$$\mathbb{E}[1/R] = \frac{\alpha}{(\alpha + 1)x_m}.$$

Therefore, the optimal behavior  $f^*$  is given by

$$f^* = \begin{cases} 1 & \text{if } x_m > 1 - \frac{1}{\alpha + 1} \\ \text{between 0 and 1} & \text{if } 1 - \frac{1}{\alpha} \leq x_m \leq 1 - \frac{1}{\alpha + 1} \\ 0 & \text{if } x_m < 1 - \frac{1}{\alpha} \end{cases}$$

**$\beta'$ -Distribution.** Let  $R$  follow the  $\beta'$ -distribution  $\beta'(\alpha, \beta)$ , where  $\alpha > 0, \beta > 0$ . The expectation of  $R$  exists only for  $\beta > 1$ , and the expectation of  $1/R$  exists only for  $\alpha > 1$ ; therefore, the parameter space is restricted to  $\alpha > 1, \beta > 1$ :

$$\mathbb{E}[R] = \frac{\alpha}{\beta - 1} \text{ and}$$

$$\mathbb{E}[1/R] = \frac{\beta}{\alpha - 1}.$$

Therefore, the optimal behavior  $f^*$  is given by

$$f^* = \begin{cases} 1 & \text{if } \beta < \alpha - 1 \\ \text{between 0 and 1} & \text{if } \alpha - 1 \leq \beta \leq \alpha + 1 \\ 0 & \text{if } \beta > \alpha + 1. \end{cases}$$

**Weibull distribution.** Let  $R$  follow the Weibull distribution  $\text{Weibull}(k, \lambda)$ , where  $k > 0, \lambda > 0$ . The expectation of  $1/R$  exists only for  $k > 1$ , and therefore, the parameter space is restricted to  $k > 1, \lambda > 0$ :

$$\mathbb{E}[R] = \lambda \Gamma\left(1 + \frac{1}{k}\right) \text{ and}$$

$$\mathbb{E}[1/R] = \frac{1}{\lambda} \Gamma\left(1 - \frac{1}{k}\right),$$

where  $\Gamma(\cdot)$  is the  $\gamma$ -function. Therefore, the optimal behavior  $f^*$  is given by

$$f^* = \begin{cases} 1 & \text{if } \lambda > \Gamma\left(1 - \frac{1}{k}\right) \\ \text{between 0 and 1} & \text{if } \frac{1}{\Gamma\left(1 + \frac{1}{k}\right)} \leq \lambda \leq \Gamma\left(1 - \frac{1}{k}\right) \\ 0 & \text{if } \lambda < \frac{1}{\Gamma\left(1 + \frac{1}{k}\right)}. \end{cases}$$

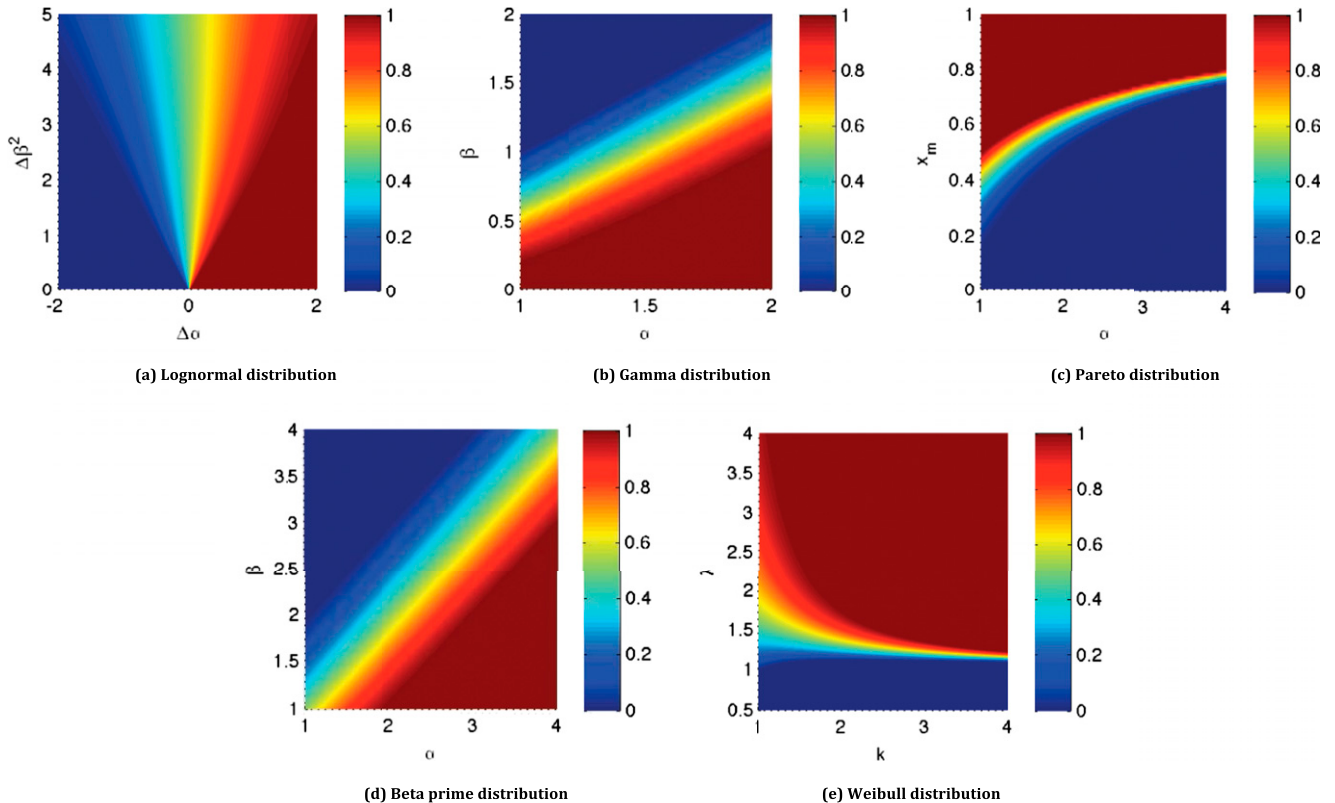

**Fig. S1.** Optimal behavior  $f^*$  for several distributions of relative fecundity  $R = \omega_a^1 / \omega_b^1$ . In A–E, different colors correspond to deterministic ( $f^* = 0$  or 1) or randomizing ( $0 < f^* < 1$ ) behavior given the particular parameters of the distribution.
